# Supplementary material for: Theoretical Investigation of Interactions between HIV-1 Tat and p53 proteins
Source: Research Square preprint supplement (doi:10.21203/rs.3.rs-4595529/v1), 2024-07-11
Supplement: Supplementary file 1 [file 73ace0a0a7ad2f678350af5c.docx]

**Supporting Information**

**Figure S1.** The number of hydrogen bonds between p53 and Tat in model1_FRODOCK for three replicas in the last 200 ns.

**Figure S2.** The number ofhydrogen bonds between p53 and Tat in model2_FRODOCK for three replicas in the last 200 ns.

**Figure S3.** The number of hydrogen bonds between p53 and Tat in model_HDOCK for three replicas in the last 2 ns.

**Table S1.** PyContact analysis from the model_ZDOCK’s replica 2 in the last 200 ns.

| **p53** | **Resid** | **Tat** | **Resid** | **interaction_type** | **mean_score** | **median_score** | **percentage** |
| --- | --- | --- | --- | --- | --- | --- | --- |
| Glu | 326 | Asp | 67 | hbond | 6.824 | 7.718 | 82.025 |
| Arg | 333 | Asp | 67 | saltbr | 4.241 | 4.943 | 62.911 |
| Gly | 356 | Lys | 50 | hbond | 3.202 | 3.882 | 56.733 |
| Asp | 352 | Gln | 63 | hbond | 2.244 | 2.282 | 49.792 |
| Glu | 326 | Glu | 71 | hbond | 2.695 | 1.094 | 45.728 |
| Glu | 339 | Arg | 57 | saltbr | 1.478 | 0.000 | 20.257 |
| Glu | 326 | Asp | 67 | hbond | 6.824 | 7.718 | 82.025 |
| Arg | 333 | Asp | 67 | saltbr | 4.241 | 4.943 | 62.911 |
| Gly | 356 | Lys | 50 | hbond | 3.202 | 3.882 | 56.733 |
